# Supplementary material for: Highly conserved interaction profiles between clinically relevant mutants of the cytomegalovirus CDK-like kinase pUL97 and human cyclins: functional significance of cyclin H
Source: Research Square preprint supplement (doi:10.21203/rs.3.rs-1676959/v1), 2022-06-03
Supplement: Supplementary file 1 [file 143296132aa977bfaa76945e.pdf]

# Supplementary Information

## Highly conserved interaction profiles between clinically relevant mutants of the cytomegalovirus CDK-like kinase pUL97 and human cyclins

Martin Schütz<sup>1,\*</sup>, Regina Müller<sup>1</sup>, Eileen Socher<sup>1,2,3</sup>, Christina Wangen<sup>1</sup>, Diana Wong<sup>4</sup>, Florian Full<sup>5</sup>, Emanuel Wyler<sup>6</sup>, Myriam Scherer<sup>7</sup>, Thomas Stamminger<sup>7</sup>, Sunwen Chou<sup>8,9</sup>, William D. Rawlinson<sup>4</sup>, Stuart T. Hamilton<sup>4,&</sup>, Heinrich Sticht<sup>2,&,\*</sup> & Manfred Marschall<sup>1,&,\*</sup>

<sup>1</sup>Institute for Clinical and Molecular Virology, Friedrich-Alexander-Universität Erlangen-Nürnberg (FAU), Schlossgarten 4, 91054 Erlangen, Germany

<sup>2</sup>Division of Bioinformatics, Institute of Biochemistry, FAU Erlangen-Nürnberg, Germany

<sup>3</sup>Functional and Clinical Anatomy, Institute of Anatomy, FAU Erlangen-Nürnberg, Germany

<sup>4</sup>Serology and Virology Division, NSW Health Pathology Microbiology, Prince of Wales Hospital, Schools of Women's and Children's Health, Medicine and Biotechnology and Biomolecular Sciences, University of New South Wales, Sydney, Australia

<sup>5</sup>Department of Medical Microbiology, Virology and Hygiene, Institute for Virology, Freiburg, Germany

<sup>6</sup>Max-Delbrück-Center for Molecular Medicine (MDC), Berlin, Germany

<sup>7</sup>Institute for Virology, Ulm University Medical Center, Ulm, Germany

<sup>8</sup>Division of Infectious Diseases, Oregon Health and Science University, Portland, Oregon, USA

<sup>9</sup>Department of Veterans Affairs Medical Center, Portland, Oregon, USA

<sup>&</sup>These authors contributed equally to the study

\*Corresponding authors: manfred.marschall@fau.de; heinrich.sticht@fau.de; martin.schuetz@uk-erlangen.de

**Table S1.** List of 473 ORF-UL97 GenBank accession numbers.

|             |             |            |            |            |            |            |
|-------------|-------------|------------|------------|------------|------------|------------|
| YP_081544.1 | AEF33987.1  | AKI22520.1 | QZX46450.1 | APG57625.1 | AKI17170.1 | AJZ68912.1 |
| AAS48981.1  | AEF33986.1  | AKI22352.1 | QZX46283.1 | APG57456.1 | AKI16669.1 | AJZ68911.1 |
| ASY06521.1  | AEF33985.1  | AKI22187.1 | QZX46115.1 | APG57286.1 | AKI16506.1 | AJZ68910.1 |
| ASY06353.1  | AEF33984.1  | AKI21686.1 | QZX45948.1 | AGT36515.1 | AKI16339.1 | AJZ68909.1 |
| ASY06184.1  | AEF33979.1  | AKI21520.1 | QUP52178.1 | ACS32399.1 | AKI16170.1 | AJZ68908.1 |
| ASY06016.1  | AEF33975.1  | AKI21021.1 | QTT59577.1 | APA46333.1 | AKI16004.1 | AJZ68907.1 |
| AAV49340.1  | AEF33973.1  | AKI20853.1 | QTT59409.1 | APA45708.1 | AKI15838.1 | AJZ68906.1 |
| AAV49339.1  | AEF33968.1  | AKI20014.1 | QTT59241.1 | APA45101.1 | AKI15505.1 | BAF64756.1 |
| AAV49338.1  | AEF33956.1  | AKI19514.1 | QTT59075.1 | AND82017.1 | AKI15337.1 | CAC42715.1 |
| AAV49337.1  | ABV04334.1  | AKI18675.1 | QTT58907.1 | AND81688.1 | AKI15170.1 | ALT14842.1 |
| AAV49336.1  | ABV04333.1  | AKI18508.1 | QTT58739.1 | AND81523.1 | AKI15002.1 | ALT14677.1 |
| AAV49335.1  | AHV84044.1  | AKI18339.1 | QTT58571.1 | AKI26591.1 | AKI14330.1 | ALK03053.1 |
| AAV49334.1  | YP_081544.1 | AKI17002.1 | QTF98549.1 | AKI26422.1 | AKI14162.1 | AHJ85175.1 |
| AAV49332.1  | AVT50513.1  | AKI16837.1 | QTF98383.1 | AKI26085.1 | AKI13996.1 | AHJ84668.1 |
| AAV49329.1  | AVT50344.1  | AKI15671.1 | QPZ45359.1 | AKI25917.1 | AKI13830.1 | AHJ82480.1 |
| AAV49328.1  | AQN73919.1  | AKI14834.1 | QPZ45196.1 | AKI25749.1 | AKI13494.1 | AHJ86183.1 |
| AAV49327.1  | AQN73413.1  | AKI14667.1 | QPZ45031.1 | AKI25581.1 | AKI13325.1 | AKI23355.1 |
| AAV49326.1  | AQN71730.1  | AKI14499.1 | QPZ44867.1 | AKI25412.1 | AKI13157.1 | AKI22855.1 |
| AAV49325.1  | AQN69707.1  | AKI13662.1 | QPZ44704.1 | AKI25242.1 | AKI12991.1 | AEF33957.1 |
| QNT12642.1  | AMJ54958.1  | AKI12659.1 | QPI35515.1 | AKI24397.1 | AKI12823.1 | AEF33955.1 |
| QGH81923.1  | AMJ54625.1  | AKI12326.1 | QPI35345.1 | AKI24227.1 | AKI12492.1 | AEF33954.1 |
| QHB20536.1  | AMJ53955.1  | AKI11329.1 | QPI35176.1 | AKI23890.1 | AKI12160.1 | AEF33953.1 |
| ABV71619.1  | AMJ53456.1  | AKI10996.1 | QPI35006.1 | AMD82420.1 | AKI11992.1 | AAA16790.1 |
| APA46116.1  | AMJ52789.1  | AKI10829.1 | BCM78255.1 | AMO64771.1 | AKI11825.1 | UBQ34163.1 |
| AAV49333.1  | AIC80516.1  | AKI09486.1 | QIA46247.1 | AMO64436.1 | AKI11661.1 | QZX46957.1 |
| AAV49331.1  | AIC80348.1  | AKI09150.1 | QIA46078.1 | AHJ83825.1 | AKI11497.1 | QZX46789.1 |
| AAV49330.1  | ACZ72839.1  | AKI08982.1 | QIA45911.1 | AHJ83658.1 | AKI11162.1 | QZX46620.1 |
| AAV49324.1  | APB97551.1  | AKI08814.1 | QIA45741.1 | AHJ83491.1 | AKI10661.1 | AMJ54123.1 |
| AAV49323.1  | APB97382.1  | AKI07810.1 | QIA45572.1 | AHJ83153.1 | AKI10494.1 | AMJ53789.1 |
| P16788.1    | APA45350.1  | AJZ68925.1 | QIA45403.1 | AHJ82984.1 | AKI10327.1 | AMJ53624.1 |
| Q6SW46.1    | AJY57929.1  | AJZ68924.1 | QIA45234.1 | AHJ82815.1 | AKI10160.1 | AMJ53289.1 |
| Q68101.1    | AJY57763.1  | AJZ68922.1 | QIA45066.1 | AFR56417.1 | AKI09991.1 | AMJ53122.1 |
| AAL10779.1  | AJY57596.1  | AJZ68921.1 | QIA44896.1 | AFR56250.1 | AKI09822.1 | AMJ52956.1 |
| AAL10777.1  | AJY57429.1  | AJZ68918.1 | QIA44728.1 | AFR55749.1 | AKI09655.1 | AMJ52623.1 |
| AAL10775.1  | AJY57262.1  | AJZ68917.1 | QBF76518.1 | AFR55580.1 | AKI09319.1 | AIC80180.1 |
| AAL10772.1  | AJY57095.1  | AJZ68916.1 | AZV24374.1 | AFR55415.1 | AKI08645.1 | APG57963.1 |
| AAL10771.1  | AJY56928.1  | AII80189.1 | AZV24204.1 | AFR55246.1 | AKI08478.1 | AKI19177.1 |
| AAL10767.1  | AJY56761.1  | AII80022.1 | AZV24034.1 | AFR55078.1 | AKI08312.1 | AKI19010.1 |
| AAL10766.1  | AJY56594.1  | AII79863.1 | QBK84323.1 | AFR54914.1 | AKI08145.1 | AKI18843.1 |
| AAL10764.1  | AJY56427.1  | AII79698.1 | ARX80476.1 | AFR54747.1 | AKI07978.1 | AKI18172.1 |
| AAL10790.1  | AJY56260.1  | AII79530.1 | ARX80308.1 | AFR54587.1 | AKI07642.1 | AKI18006.1 |
| AAL10789.1  | AJY56093.1  | AHB19899.1 | AQN73750.1 | AHJ86015.1 | AHB20064.1 | AKI17839.1 |

|            |            |            |            |            |            |            |
|------------|------------|------------|------------|------------|------------|------------|
| AAL10788.1 | AJY55926.1 | AGL96685.1 | AQN73581.1 | AHJ85848.1 | AHB19733.1 | AKI17673.1 |
| AAL10787.1 | AJY55759.1 | AAR31648.1 | AQN73245.1 | AHJ85681.1 | AHB19566.1 | AKI17506.1 |
| AAL10786.1 | AJY55592.1 | ACT81767.1 | AQN73077.1 | AHJ85513.1 | AHB19398.1 | AKI17339.1 |
| AAL10785.1 | AJY55425.1 | ACS93428.1 | AQN72907.1 | AHJ85344.1 | AGT36386.1 | ACF74517.1 |
| AAL10784.1 | AJY55258.1 | ACS92186.1 | AQN72738.1 | AHJ85005.1 | AGQ47315.1 | AZB79970.1 |
| AAL10783.1 | AJY55091.1 | BAJ06835.1 | AQN72570.1 | AHJ84837.1 | ACZ80337.1 | ADV04413.1 |
| AAL10782.1 | AJY54924.1 | AEF33983.1 | AQN72401.1 | AHJ84499.1 | ACZ80172.1 | ABA26301.1 |
| AAL10781.1 | AJY54757.1 | AEF33982.1 | AQN72233.1 | AHJ84331.1 | ACZ80007.1 | ABA26313.1 |
| AAL10780.1 | ADD39142.1 | AEF33981.1 | AQN72064.1 | AHJ84163.1 | ACZ79843.1 | QHX40593.1 |
| AAL10778.1 | AND81852.1 | AEF33980.1 | AQN71897.1 | AHJ82143.1 | ACU83746.1 | QHX40112.1 |
| AAL10776.1 | AKI24903.1 | AEF33978.1 | AQN71560.1 | AHJ81975.1 | ACT81932.1 | CAA35333.1 |
| AAL10774.1 | AMO64939.1 | AEF33977.1 | AQN71391.1 | ALN67084.1 | ACS92021.1 | AKI24565.1 |
| AAL10773.1 | AMO64604.1 | AEF33976.1 | AQN71222.1 | ALL26239.1 | ACM48074.1 | AKI24058.1 |
| AAL10770.1 | AHJ83995.1 | AEF33974.1 | AQN71053.1 | AKI23522.1 | ACL51165.1 | AKI23722.1 |
| AAL10769.1 | AHJ83322.1 | AEF33972.1 | AQN70884.1 | AKI23190.1 | DAA00194.1 | AKI19847.1 |
| AAL10768.1 | AHJ82649.1 | AEF33971.1 | AQN70715.1 | AKI23023.1 | AAA16789.1 | AKI19679.1 |
| AAL10765.1 | AFR56083.1 | AEF33970.1 | AQN70546.1 | AKI22687.1 | APG57795.1 | AKI19346.1 |
| AAL10763.1 | AFR55915.1 | AEF33969.1 | AQN70380.1 | AKI22021.1 | APA46260.1 | AMJ54790.1 |
| AAV85476.1 | ADE88088.1 | AEF33967.1 | AQN70213.1 | AKI21853.1 | APA45838.1 | AMJ54457.1 |
| ALK03055.1 | ALT16318.1 | AEF33966.1 | AQN70043.1 | AKI21356.1 | APA45592.1 | AMJ54290.1 |
| ALK03054.1 | ALT16153.1 | AEF33965.1 | AQN69874.1 | AKI21188.1 | APA45474.1 | AEF33960.1 |
| ALK03052.1 | ALT15997.1 | AEF33964.1 | AQN69539.1 | AKI20685.1 | APA45223.1 | AEF33959.1 |
| AJZ68923.1 | ALT15832.1 | AEF33963.1 | AQN69370.1 | AKI20517.1 | AKI26254.1 | AEF33958.1 |
| AJZ68920.1 | ALT15667.1 | AEF33962.1 | ATP76347.1 | AKI20350.1 | AKI25072.1 | ALT15172.1 |
| AJZ68919.1 | ALT15502.1 | AEF33961.1 | AMJ55123.1 | AKI20182.1 | AKI24734.1 | ALT15007.1 |
| AJZ68915.1 | ALT15337.1 | AJZ68913.1 | AJZ68914.1 |            |            |            |

**Table S2.** Oligonucleotide primers used for BACmid recombinations.

|                     |                                                                                               |
|---------------------|-----------------------------------------------------------------------------------------------|
| H411Y-for           | CACGGCCACGGGCTGCTGTCTGCTGCACAACGTCACGGTATATCGACGTTTCCACACAGACATTAGG<br>GATAACAGGGTAATCGATTT   |
| H411Y-rev           | TCCACTGGTTCGTGATGAAACATGTCTGTGTGGAAACGTCGATATACCGTGACGTTGTGCAGCAGCCA<br>GTGTTACAACCAATTAACC   |
| T409M-for           | TCTGCTCACGGCCACGGGCTGCTGTCTGCTGCACAACGTCATGGTACATCGACGTTTCCACACTAGG<br>GATAACAGGGTAATCGATTT   |
| T409M-rev           | GGTCGTGATGAAACATGTCTGTGTGGAAACGTCGATGTACCGTGACGTTGTGCAGCAGACAGCGCCA<br>GTGTTACAACCAATTAACC    |
| F342S-for           | GGACATGAGCGACGAGAGCTACCGCCTGGGCCAGGGCTCCTCCGGCGAGGTCTGGCCGCTCGATAGG<br>GATAACAGGGTAATCGATTT   |
| F342S-rev           | CCTTGACCACGCGATAGCGATCGAGCGGCCAGACCTCGCCGGAGGAGCCCTGGCCCAGGCGGTGCCA<br>GTGTTACAACCAATTAACC    |
| L595S-for           | GGCGTTGCTCTTTAAGCACGCCGGCGCGGCCCTGCCGCGCGTCCGGAGAACGGCAAGCTCACGCATAGG<br>GATAACAGGGTAATCGATTT |
| L595S-rev           | GCAGACAGGCGTCCGGAGCAGTGCCTGAGCTTGCCGTTCTCCGACGCGCGGCAGGCCGCGCCGGGCCA<br>GTGTTACAACCAATTAACC   |
| Del.599-<br>600-for | TAAGCACGCCGGCGCGGCCCTGCCGCGCGTGGAGAACGGCAGCAGTCTCCGACGCGCTGTAGGGAT<br>AACAGGGTAATCGATTT       |
| Del.599-<br>600-rev | GCGCCGCCAGAATGAGCAGACAGGCGTCCGGAGCAGTGCCTGCCGTTCTCCAACGCGCGGCCAGTG<br>TTACAACCAATTAACC        |
| H469V-for           | TGATATTACCCCATGAACGTGCTCATCGACGTGAACCCGGTCAACCCAGCGAGATCGTGCGTAGG<br>GATAACAGGGTAATCGATTT     |
| H469-rev            | TGTAATCGCACAGCGCGCGCAGCATCTCGCTGGGGTTGACCGGGTTCACGTCGATGAGCAGCCA<br>GTGTTACAACCAATTAACC       |
| K359Q-for           | CTGGCCGCTCGATCGCTATCGCGTGGTCAAGGTGGCGCGTCAGCACAGCGAGACGGTGCTCACTAGG<br>GATAACAGGGTAATCGATTT   |
| K359Q-rev           | TCAGGCCGACATCCAGACCGTGAGCACCGTCTCGCTGTGCTGACGCGCCACCTTGACCACGCGCCA<br>GTGTTACAACCAATTAACC     |
| L397R-for           | GCCGCCGTCGCTGGTGGGCACGGGCGTGCACCGCGGTCTGCGCACGGCCACGGGCTGCTGTCTTAGG<br>GATAACAGGGTAATCGATTT   |
| L397R-rev           | GTACCGTGACGTTGTGCAGCAGACAGCAGCCCGTGGCCGTGCGCAGACCGCGGTGCACGCCCGGCCA<br>GTGTTACAACCAATTAACC    |
| M460V-for           | CAATCACCAGTGTCTGTATGCCACTTTGATATTACACCCGTGAACGTGCTCATCGACGTGAATAGG<br>GATAACAGGGTAATCGATTT    |
| M460V-rev           | TCTCGCTGGGGTTGTGCGGGTTCACGTCGATGAGCACGTTACGGGTGTAATATCAAAGTGGCGCCA<br>GTGTTACAACCAATTAACC     |
| C480F-for           | GAACCCGCACAACCCAGCGAGATCGTGCGCGCCGCGTGTTCGATTACAGCCTCAGCGAGCCTAGG<br>GATAACAGGGTAATCGATTT     |
| C480F-rev           | GCTCGTTGTAATCCGGATAGGGCTCGCTGAGGCTGTAATCGAACAGCGCGCGCACGATCTGCCA<br>GTGTTACAACCAATTAACC       |
| H520Q-for           | CCGCATCCCCAAGTCTGCGACCGTCTGCGCGAATGTTACCAACCTGCTTTCGACCCATGCCTAGG<br>GATAACAGGGTAATCGATTT     |
| H520Q-rev           | AGATGAGCAGCTTCTGCAGCGGCATGGGTCCGAAAGCAGGTTGGTAACATTCGCGCAGACGGTGCCA<br>GTGTTACAACCAATTAACC    |
| C592G-for           | GGGTACGGAGGCGTTGCTCTTTAAGCACGCCGGCGCGGCCGGCCGCGCGTGGAGAACGGCAATAGG<br>GATAACAGGGTAATCGATTT    |
| C592G-rev           | CGTCCGAGCAGTGCCTGAGCTTGCCGTTCTCCAACGCGCGGCCGGCCGCGCGCGGCGTGTAAAGCCA<br>GTGTTACAACCAATTAACC    |
| E596G-for           | GTTGCTCTTTAAGCACGCCGGCGCGGCCCTGCCGCGGTTGGGGAACGGCAAGCTCACGCAGTGTAGG<br>GATAACAGGGTAATCGATTT   |
| E596G-rev           | TGAGCAGACAGGCGTCCGGAGCAGTGCCTGAGCTTGCCGTTCCCAACGCGCGGCAGGCCGCGCGCCA<br>GTGTTACAACCAATTAACC    |
| C603W-for           | CGCGGCCTGCCGCGCGTGGAGAACGGCAAGCTCACGCAGTGGTCCGACGCGCTGTCTGCTCATTAGG<br>GATAACAGGGTAATCGATTT   |
| C603W-rev           | AGTCTATTTGCGCCGCCAGAATGAGCAGACAGGCGTCCGACCAGTGCCTGAGCTTGCCGTTCTGCCA<br>GTGTTACAACCAATTAACC    |

|             |                                                                                                    |
|-------------|----------------------------------------------------------------------------------------------------|
| US1-for     | CGCATGGGAAGGCTGGACACGCCGACCGAGAGGTCACCGAGCCCGGACGCCATCCTGTGACGGAAGATCACTTCG                        |
| US1R-rev    | GGAGCGGAGGAGGTGACCTGGCTGCTTAATGACAGCGACGGAGAGGAAGAAGAGCTGAGGTTCTTATGGCTCTTG                        |
| US1-for     | CCGCATGGGAAGGCTGGACACGCCGACCGAGAGGTCACCGAGCCCGGACGCCATCTGCTTCGCGATGTACGGGCCAGATATA                 |
| US1-IR-rev  | ACCGCGGAGCGGAGGAGGTGACCTGGCTGCTTAATGACAGCGACGGAGAGGAAGAAGAGATTGCAGCACAGAAAAGCATCTTAC               |
| UL97-for    | GGTCTGGACGAGGTGCGCATGGGTACGGAGGCGTTGCTCTTTAAGCACGCCGGCGGGCTGCCGCGCGTTGGAGAACCCTGTGACGGAAGATCACTTCG |
| UL97-rev    | CGCCAGGAGACAGGCGCCGTAGCTCATTTCGCCGCCAGAATGAGCAGACAGGCGTCGGAGCAGTCGTGAGCTTGCCCTGAGGTTCTTATGGCTCTTG  |
| UL97-for    | GATGCGTGACGGAGAAAAAGAGGACGCGGCTTCGGACAAGGAGAACCAGCGTCGGCCCGTGGTGCCGTCCACGTCCCTGTGACGGAAGATCACTTCG  |
| UL97-rev    | GAACGACCACATGGCCGAGGTTTCGCGGCAGCGCAAGCCGTGGTAACCGTCGCCGCTGGCGGCGCTGCCGAGACCTGAGGTTCTTATGGCTCTTG    |
| A594V       | CTTTAAGCACGCCGGCGGGCTGCCGCGTGTGGAGAACGGCAAGCTCACGCACTGCTCCGACGCCGTCTGCTCATTC                       |
| P132L       | GCGGCTTCGGACAAGGAGAACCAGCGTCGGCCCGTGGTGTGTCCACGTGCTCTCGCGGCAGCGCCGCCAGCGGGACGGT                    |
| 236-275 For | AGAAAACGACGTGGAGCTGCGCGCGGAAAGTCAGGACAGCAACGACCAGATCATCACCCTAGGGATAACAGGGTAATCGATTT                |
| 236-275 Rev | ACGTAAGGCCGCGGATGGACGTGGTGATGATCTGGTCGTTGCTGTCTGACTTTCGCGCGCCAGTGTACAACCAATTAACC                   |
| 241-270 For | GCTGCGCGCGGAAAGTCAGGACAGCGCCGTGGCATCGGGCCATTGCACCTGTTCCAACGATAGGGATAACAGGGTAATCGATTT               |
| 241-270 Rev | TGGACGTGGTGATGATCTGGTCGTTGGAACAGGTGCAATGGCCCGATGCCACGGCGCTGTGCCAGTGTACAACCAATTAACC                 |
| 246-265-For | TCAGGACAGCGCCGTGGCATCGGGCCCGGGCCGATTCCTCACACGACGACGTGCATTGTAGGGATAACAGGGTAATCGATTT                 |
| 246-265-Rev | TCTGGTCGTTGGAACAGGTGCAATGCACGTCGTGCTGTGACGGAATGCGGCCCGGGCCCGCCAGTGTACAACCAATTAACC                  |
| 251-260 For | GGCATCGGGCCCGGGCCGATTCGCGAGCCGCTCAGCGGTGAGGCCGACTCCACGTACATAGGGATAACAGGGTAATCGATTT                 |
| 251-260 Rev | AGGTGCAATGCACGTCGTGCTGTGACGTGGAGTCGGCCTCACCGCTGAGCGGCTGCGGAAGCCAGTGTACAACCAATTAACC                 |

**Table S3.** Sequences, primers, target exon, on-target and off-target scores for CRISPR/Cas9 KO.

| Name              | Sequence             | Primer                    | Exon | On-target | Off-target |
|-------------------|----------------------|---------------------------|------|-----------|------------|
| Cyclin B1 (A)-For | AGGCGCAAAGCGCGTTCCTA | CACCGAGGCGCAAAGCGCGTTCCTA | 2    | 47.3      | 96.0       |
| Cyclin B1 (A)-Rev |                      | AACTAGGAACGCGCTTTCGCGCTC  |      |           |            |
| Cyclin B1 (B)-For | CCTAATTGACTGGCTAGTAC | CACCGCCTAATTGACTGGCTAGTAC | 5    | 50.0      | 85.8       |
| Cyclin B1 (B)-Rev |                      | AAACGTACTAGCCAGTCAATTAGGC |      |           |            |
| Cyclin B1 (C)-For | CCATGGCGCTCCGAGTCACC | CACCGCCATGGCGCTCCGAGTCACC | 1    | 46.5      | 85.6       |
| Cyclin B1 (C)-Rev |                      | AAACGGTGACTCGGAGCGCCATGGC |      |           |            |
| Cyclin T1 (A)-For | CCACGCCAAAACGACGGGAT | CACCGCCACGCCAAAACGACGGGAT | 1    | 62.6      | 95.9       |
| Cyclin T1 (A)-Rev |                      | AAACATCCCGTCGTTTTGGCGTGCC |      |           |            |

|                   |                          |                                |   |      |      |
|-------------------|--------------------------|--------------------------------|---|------|------|
| Cyclin T1 (B)-For | AGAACTTTCTTATCG<br>CCAGC | CACCGAGAACTTTCTTAT<br>CGCCAGC  | 1 | 55.7 | 82.1 |
| Cyclin T1 (B)-Rev |                          | AAACGCTGGCGATAAGAA<br>AGTTCTC  |   |      |      |
| Cyclin T1 (C)-For | GTTTCTAGCAGCTAA<br>AGTGG | CACCGGTTTTCTAGCAGCT<br>AAAGTGG | 3 | 69.3 | 70.7 |
| Cyclin T1 (C)-Rev |                          | AAACCCACTTTAGCTGCT<br>AGAAACC  |   |      |      |
| Cyclin H (A)-For  | GCCGCTTCTGACTAC<br>TGTTG | CACCGGCCGCTTCTGACT<br>ACTGTTG  | 1 | 64.5 | 82.9 |
| Cyclin H (A)-Rev  |                          | AAACCAACAGTAGTCAGA<br>AGCGGCC  |   |      |      |
| Cyclin H (B)-For  | GTCCAAGAGGACTCT<br>CCCCG | CACCGGTCCAAGAGGACT<br>CTCCCGG  | 4 | 73.4 | 82.5 |
| Cyclin H (B)-Rev  |                          | AAACCCGGGAGAGTCCTC<br>TTGGACC  |   |      |      |
| Cyclin H (C)-For  | ATTCTCCAATATGGG<br>ATAGC | CACCGATTCTCCAATATG<br>GGATAGC  | 5 | 60.5 | 79.0 |
| Cyclin H (C)-Rev  |                          | AAACGCTATCCCATATTG<br>GAGAATC  |   |      |      |
| Cyclin H (E)-For  | CCGGGAGAGTCCTCT<br>TGGAC | CACCGCCGGGAGAGTCCT<br>CTTGGAC  | 4 | 52.8 | 44.0 |
| Cyclin H (E)-Rev  |                          | AAACGTCCAAGAGGACTC<br>TCCCGGC  |   |      |      |
| Cyclin H (F)-For  | CAGTAATGGAATATC<br>ACCCC | CACCGCAGTAATGGAATA<br>TCACCCC  | 3 | 62.5 | 43.1 |
| Cyclin H (F)-Rev  |                          | AAACGGGGTGATATTCCA<br>TTACTGC  |   |      |      |
